# Supplementary material for: Ion pairing in tetraphenylporphyrin oxidation: a semiquantitative study
Source: Royal Society of Chemistry journal article supplement (doi:10.1039/b506109a), 2005-01-01
Supplement: b506109a.pdf [file b506109a.pdf]

## Ion pairing in tetraphenylporphyrin oxidation: a semiquantitative study

**Haoran Sun, Justin C. Biffinger and Stephen G. DiMagno\***

*Department of Chemistry and Center for Materials Research and Analysis, University of Nebraska-Lincoln, Lincoln, Nebraska, USA. Fax: 402 472-9402; Tel: 402 472-9895; E-mail: [sdimagno1@unl.edu](mailto:sdimagno1@unl.edu)*

1. Digital simulation parameters for measuring ion pairing equilibrium constants.
2. Z-matrix file of optimized TPPH<sub>2</sub><sup>2+</sup> dication structure
3. Cyclic voltammogram background of 0.1 M TBATFPB DFB solution.

1. Digital simulation parameters for measuring ion pairing equilibrium constants. Each of the ion pairing equilibrium constants,  $K_1$ ,  $K_2$  and  $K_3$  was measured by cyclic voltammetry and digital simulation for cyclic voltammetry separately. At high concentration (0.1 M) of TBAX ( $X=PF_6^-$ ,  $ClO_4^-$ ,  $NTf_2^-$ ,  $BF_4^-$ , and  $OTf^-$ ),  $K_1$  was measured by comparing the first oxidation potential to that in TBATFPB solution with identical concentration of free TBA cation (in order to keep the first reduction potential constant and to use it as an internal potential standard). At constant free TBA cation concentration,  $K_2$  and  $K_3$  were measured by cyclic voltammetric titration and digital simulation with different TBAX ( $X=PF_6^-$ ,  $ClO_4^-$ ,  $NTf_2^-$ ,  $BF_4^-$ , and  $OTf^-$ ).

a) Digital simulation for  $K_1$

source program: DigiSim for Windows 95

program version: 3.05

file type: CV

charge transfer reactions:

reaction[1]:  $a + e = b$

homogeneous chemical reactions:

reaction[1]:  $a + c = d$

reaction[2]:  $f + c = g$

experimental parameters:

Estart (V): 1.5

Eswitch (V): 2.5

Eend (V): 1.5

v (V/s): 0.1

temperature (K): 298.2

Ru (Ohms): 1000

Cdl (F): 2E-006

cycles: 1

electrode geometry: planar

area (cm<sup>2</sup>): 0.0314

diffusion: semi-infinite

pre-equilibrium: enabled for all reactions

charge transfer parameters:

E0[1] (V): 2.278

alpha[1]: 0.5

ks[1] (cm/s): 10

chemical reaction parameters:

Keq[1]: 520 (variable)

kf[1]: 1E+012

kb[1]: 1.9231E+009  
Keq[2]: 1200  
kf[2]: 1E+012  
kb[2]: 8.3333E+008

species parameters:

Canal[a] (M/l): 0  
Cinit[a] (M/l): 8.5246E-017  
D[a] (cm<sup>2</sup>/s): 5E-006  
Canal[b] (M/l): 0.0012  
Cinit[b] (M/l): 0.0012  
D[b] (cm<sup>2</sup>/s): 5E-006  
Canal[c] (M/l): 0  
Cinit[c] (M/l): 0.0087215  
D[c] (cm<sup>2</sup>/s): 1E-005  
Canal[d] (M/l): 0  
Cinit[d] (M/l): 3.8656E-016  
D[d] (cm<sup>2</sup>/s): 5E-006  
Canal[f] (M/l): 0  
Cinit[f] (M/l): 0.0087215  
D[f] (cm<sup>2</sup>/s): 1E-005  
Canal[g] (M/l): 0.1  
Cinit[g] (M/l): 0.091278  
D[g] (cm<sup>2</sup>/s): 1E-005

model parameters:

expanding space factor: 0.1  
potential step (V): 0.001  
iterations: 1  
noise\_level (A): 0  
D/k: 50  
xmax/sqrt(Dt): 6  
r0 minimum: 20

simulation statistics:

CPU-time: 3.425  
maximum number of boxes: 176  
model diffusion coefficient: 1.0014E+012  
total number of corrections: 0  
number of potential steps with corrections: 0  
Imin: -7.2176E-006  
Imax: 5.2728E-006  
Cmax: 0.091278

**Formatted:** Spanish  
(Spain-Modern Sort)

b) Digital simulation for  $K_2$

source program: DigiSim for Windows 95  
program version: 3.05  
file type: CV

charge transfer reactions:

reaction[1]:  $a + e = b$   
reaction[2]:  $b + e = c$

homogeneous chemical reactions:

reaction[1]:  $d + f = g$   
reaction[2]:  $d + h = i$   
reaction[3]:  $a + h = j$   
reaction[4]:  $b + h = k$

experimental parameters:

Estart (V): -0.2  
Eswitch (V): 1.5  
Eend (V): -0.2  
 $v$  (V/s): 0.1  
temperature (K): 298.2  
Ru (Ohms): 1000  
Cdl (F): 2E-006  
cycles: 1  
electrode geometry: planar  
area (cm<sup>2</sup>): 0.0314  
diffusion: semi-infinite  
pre-equilibrium: enabled for all reactions

charge transfer parameters:

E0[1] (V): 1.377  
 $\alpha$ [1]: 0.5  
 $k_s$ [1] (cm/s): 10  
E0[2] (V): 0.777  
 $\alpha$ [2]: 0.5  
 $k_s$ [2] (cm/s): 10

chemical reaction parameters:

Keq[1]: 65  
 $k_f$ [1]: 1E+012  
 $k_b$ [1]: 1.5385E+010  
Keq[2]: 1200  
 $k_f$ [2]: 1E+012  
 $k_b$ [2]: 8.3333E+008

Keq[3]: 1.9E+006 (variable)  
kf[3]: 1E+012  
kb[3]: 5.2632E+005  
Keq[4]: 520  
kf[4]: 1E+012  
kb[4]: 1.9231E+009

species parameters:

Canal[a] (M/l): 0  
Cinit[a] (M/l): 8.2336E-047  
D[a] (cm<sup>2</sup>/s): 5E-006  
Canal[b] (M/l): 0  
Cinit[b] (M/l): 3.694E-020  
D[b] (cm<sup>2</sup>/s): 5E-006  
Canal[c] (M/l): 0.0012  
Cinit[c] (M/l): 0.0012  
D[c] (cm<sup>2</sup>/s): 5E-006  
Canal[d] (M/l): 0  
Cinit[d] (M/l): 0.032065  
D[d] (cm<sup>2</sup>/s): 1E-005  
Canal[f] (M/l): 0  
Cinit[f] (M/l): 0.032034  
D[f] (cm<sup>2</sup>/s): 1E-005  
Canal[g] (M/l): 0.0988  
Cinit[g] (M/l): 0.066766  
D[g] (cm<sup>2</sup>/s): 1E-005  
Canal[h] (M/l): 0  
Cinit[h] (M/l): 3.0397E-005  
D[h] (cm<sup>2</sup>/s): 1E-005  
Canal[i] (M/l): 0.0012  
Cinit[i] (M/l): 0.0011696  
D[i] (cm<sup>2</sup>/s): 1E-005  
Canal[j] (M/l): 0  
Cinit[j] (M/l): 4.755E-045  
D[j] (cm<sup>2</sup>/s): 5E-006  
Canal[k] (M/l): 0  
Cinit[k] (M/l): 5.839E-022  
D[k] (cm<sup>2</sup>/s): 5E-006

model parameters:

expanding space factor: 0.1  
potential step (V): 0.001  
iterations: 1  
noise\_level (A): 0  
D/k: 50  
xmax/sqrt(Dt): 6

Electronic Supplementary Information for Dalton Transactions  
This journal is © The Royal Society of Chemistry 2005

r0 minimum: 20

simulation statistics:

CPU-time: 19.228

maximum number of boxes: 182

model diffusion coefficient: 2.0091E+012

total number of corrections: 0

number of potential steps with corrections: 0

Imin: -8.5306E-006

Imax: 6.5465E-006

Cmax: 0.067081

c) Digital simulation for  $K_3$

source program: DigiSim for Windows 95  
program version: 3.05  
file type: CV

charge transfer reactions:

reaction[1]:  $a + e = b$   
reaction[2]:  $b + e = c$

homogeneous chemical reactions:

reaction[1]:  $d + f = g$   
reaction[2]:  $d + h = i$   
reaction[3]:  $a + h = j$   
reaction[4]:  $j + h = l$   
reaction[5]:  $b + h = k$

experimental parameters:

Estart (V): -0.2  
Eswitch (V): 1.5  
Eend (V): -0.2  
 $v$  (V/s): 0.1  
temperature (K): 298.2  
Ru (Ohms): 1000  
Cdl (F): 2E-006  
cycles: 1  
electrode geometry: planar  
area (cm<sup>2</sup>): 0.0314  
diffusion: semi-infinite  
pre-equilibrium: enabled for all reactions

charge transfer parameters:

E0[1] (V): 1.377  
 $\alpha$ [1]: 0.5  
 $k_s$ [1] (cm/s): 10  
E0[2] (V): 0.777  
 $\alpha$ [2]: 0.5  
 $k_s$ [2] (cm/s): 10

chemical reaction parameters:

Keq[1]: 65  
 $k_f$ [1]: 1E+012  
 $k_b$ [1]: 1.5385E+010  
Keq[2]: 1200  
 $k_f$ [2]: 1E+012

kb[2]: 8.3333E+008  
Keq[3]: 1.9E+006  
kf[3]: 1E+012  
kb[3]: 5.2632E+005  
Keq[4]: 6700 (variable)  
kf[4]: 1E+012  
kb[4]: 1.4925E+008  
Keq[5]: 520  
kf[5]: 1E+012  
kb[5]: 1.9231E+009

species parameters:

Canal[a] (M/l): 0  
Cinit[a] (M/l): 8.2335E-047  
D[a] (cm<sup>2</sup>/s): 5E-006  
Canal[b] (M/l): 0  
Cinit[b] (M/l): 3.694E-020  
D[b] (cm<sup>2</sup>/s): 5E-006  
Canal[c] (M/l): 0.0012  
Cinit[c] (M/l): 0.0012  
D[c] (cm<sup>2</sup>/s): 5E-006  
Canal[d] (M/l): 0  
Cinit[d] (M/l): 0.030279  
D[d] (cm<sup>2</sup>/s): 1E-005  
Canal[f] (M/l): 0  
Cinit[f] (M/l): 0.029985  
D[f] (cm<sup>2</sup>/s): 1E-005  
Canal[g] (M/l): 0.089  
Cinit[g] (M/l): 0.059015  
D[g] (cm<sup>2</sup>/s): 1E-005  
Canal[h] (M/l): 0  
Cinit[h] (M/l): 0.00029463  
D[h] (cm<sup>2</sup>/s): 1E-005  
Canal[i] (M/l): 0.011  
Cinit[i] (M/l): 0.010705  
D[i] (cm<sup>2</sup>/s): 1E-005  
Canal[j] (M/l): 0  
Cinit[j] (M/l): 4.6075E-044  
D[j] (cm<sup>2</sup>/s): 5E-006  
Canal[l] (M/l): 0  
Cinit[l] (M/l): 9.095E-044  
D[l] (cm<sup>2</sup>/s): 5E-006  
Canal[k] (M/l): 0  
Cinit[k] (M/l): 5.6595E-021  
D[k] (cm<sup>2</sup>/s): 5E-006



Electronic Supplementary Information for Dalton Transactions  
This journal is © The Royal Society of Chemistry 2005

model parameters:

expanding space factor: 0.1

potential step (V): 0.005

iterations: 1

noise\_level (A): 0

D/k: 50

xmax/sqrt(Dt): 6

r0 minimum: 20

simulation statistics:

CPU-time: 5.237

maximum number of boxes: 183

model diffusion coefficient: 1.2546E+013

total number of corrections: 90

number of potential steps with corrections: 3

Imin: -9.2998E-006

Imax: 6.7587E-006

Cmax: 0.05954

2. Z-matrix file of optimized TPPH<sub>2</sub><sup>2+</sup> dication structure

Calculated by DFT at B3LYP/6-311G\* level

N  
C,1,R2  
C,1,R2,2,A3  
C,2,R4,1,A4,3,D4,0  
C,2,R5,1,A5,4,D5,0  
C,3,R4,1,A4,2,-D4,0  
C,3,R5,1,A5,6,-D5,0  
C,7,R8,3,A8,1,D8,0  
C,5,R8,2,A8,1,-D8,0  
C,5,R10,2,A10,9,D10,0  
C,7,R10,3,A10,8,-D10,0  
H,4,R12,2,A12,1,D12,0  
H,6,R12,3,A12,1,-D12,0  
N,8,R14,7,A14,3,D14,0  
N,9,R14,5,A14,2,-D14,0  
C,8,R16,7,A16,14,D16,0  
C,9,R16,5,A16,15,-D16,0  
C,11,R18,7,A18,3,D18,0  
C,11,R19,7,A19,18,D19,0  
C,10,R18,5,A18,2,-D18,0  
C,10,R19,5,A19,20,-D19,0  
H,14,R22,8,A22,7,D22,0  
H,15,R22,9,A22,5,-D22,0  
C,14,R14,8,A24,22,D24,0  
C,15,R14,9,A24,23,-D24,0  
C,16,R26,8,A26,7,D26,0  
C,17,R26,9,A26,5,-D26,0  
C,18,R28,11,A28,7,D28,0  
C,19,R29,11,A29,7,D29,0  
C,20,R28,10,A28,5,-D28,0  
C,21,R29,10,A29,5,-D29,0  
H,16,R32,8,A32,26,D32,0  
H,17,R32,9,A32,27,-D32,0  
H,18,R34,11,A34,28,D34,0  
H,19,R35,11,A35,29,D35,0  
H,20,R34,10,A34,30,-D34,0  
H,21,R35,10,A35,31,-D35,0  
C,24,R8,14,A14,8,D38,0  
C,25,R8,15,A14,9,-D38,0  
C,30,R40,20,A40,10,D40,0  
C,28,R40,18,A40,11,-D40,0

Electronic Supplementary Information for Dalton Transactions

This journal is © The Royal Society of Chemistry 2005

H,26,R32,16,A42,8,D42,0  
H,27,R32,17,A42,9,-D42,0  
H,28,R44,18,A44,41,D44,0  
H,29,R45,19,A45,11,D45,0  
H,30,R44,20,A44,40,-D44,0  
H,31,R45,21,A45,10,-D45,0  
C,39,R5,25,A8,15,D14,0  
C,38,R5,24,A8,14,-D14,0  
C,38,R10,24,A50,49,D50,0  
C,39,R10,25,A50,48,-D50,0  
H,40,R52,30,A52,20,D52,0  
H,41,R52,28,A52,18,-D52,0  
N,48,R2,39,A5,25,D8,0  
C,48,R4,39,A55,54,D55,0  
C,49,R4,38,A55,24,D56,0  
C,50,R18,38,A18,24,D57,0  
C,50,R19,38,A19,57,-D19,0  
C,51,R18,39,A18,25,-D57,0  
C,51,R19,39,A19,59,D19,0  
C,57,R28,50,A28,38,-D28,0  
C,58,R29,50,A29,38,-D29,0  
C,59,R28,51,A28,39,D28,0  
C,60,R29,51,A29,39,D29,0  
H,55,R12,48,A12,39,D65,0  
H,56,R12,49,A12,38,-D65,0  
H,57,R34,50,A34,61,-D34,0  
H,58,R35,50,A35,62,-D35,0  
H,59,R34,51,A34,63,D34,0  
H,60,R35,51,A35,64,D35,0  
C,63,R40,59,A40,51,-D40,0  
C,61,R40,57,A40,50,D40,0  
H,61,R44,57,A44,72,-D44,0  
H,62,R45,58,A45,50,-D45,0  
H,63,R44,59,A44,71,D44,0  
H,64,R45,60,A45,51,D45,0  
H,71,R52,63,A52,59,-D52,0  
H,72,R52,61,A52,57,D52,0

Variables:

R2=1.36435492  
R4=1.45126812  
R5=1.42084485  
R8=1.4312643  
R10=1.46252088  
R12=1.07843433  
R14=1.36994299  
R16=1.41785631

R18=1.41416667  
R19=1.41458246  
R22=1.00988437  
R26=1.38068494  
R28=1.38589718  
R29=1.3860933  
R32=1.07761001  
R34=1.08321514  
R35=1.08345076  
R40=1.39736403  
R44=1.08394328  
R45=1.08394677  
R52=1.08428537  
A3=104.97276713  
A4=111.25606401  
A5=124.12725346  
A8=123.83476838  
A10=119.02897011  
A12=126.34696157  
A14=125.70853545  
A16=127.0996711  
A18=120.51627403  
A19=120.88167618  
A22=124.80888358  
A24=110.07493217  
A26=107.75462249  
A28=120.46314907  
A29=120.48637394  
A32=125.33553951  
A34=119.62429279  
A35=119.72164198  
A40=120.13181587  
A42=126.86606239  
A44=119.81331426  
A45=119.83690123  
A50=117.13522142  
A52=119.91666573  
A55=124.58955565  
D4=-4.09317089  
D5=178.17878836  
D8=-15.34199318  
D10=-179.6178497  
D12=-174.5525606  
D14=-17.28101543  
D16=-178.540081  
D18=-45.60801749

Electronic Supplementary Information for Dalton Transactions  
This journal is © The Royal Society of Chemistry 2005

D19=179.99161644  
D22=9.73203351  
D24=173.87975298  
D26=177.31960915  
D28=-179.0446094  
D29=-178.83387727  
D32=177.72738884  
D34=176.32056643  
D35=176.07337393  
D38=176.38821351  
D40=2.08602443  
D42=177.6826566  
D44=179.73508649  
D45=177.54152323  
D50=179.62453069  
D52=178.90175737  
D55=-177.9381535  
D56=-166.71985331  
D57=-134.03529079  
D65=-7.27872838

3. Cyclic voltammogram background of 0.1 M TBATFPB DFB solution.

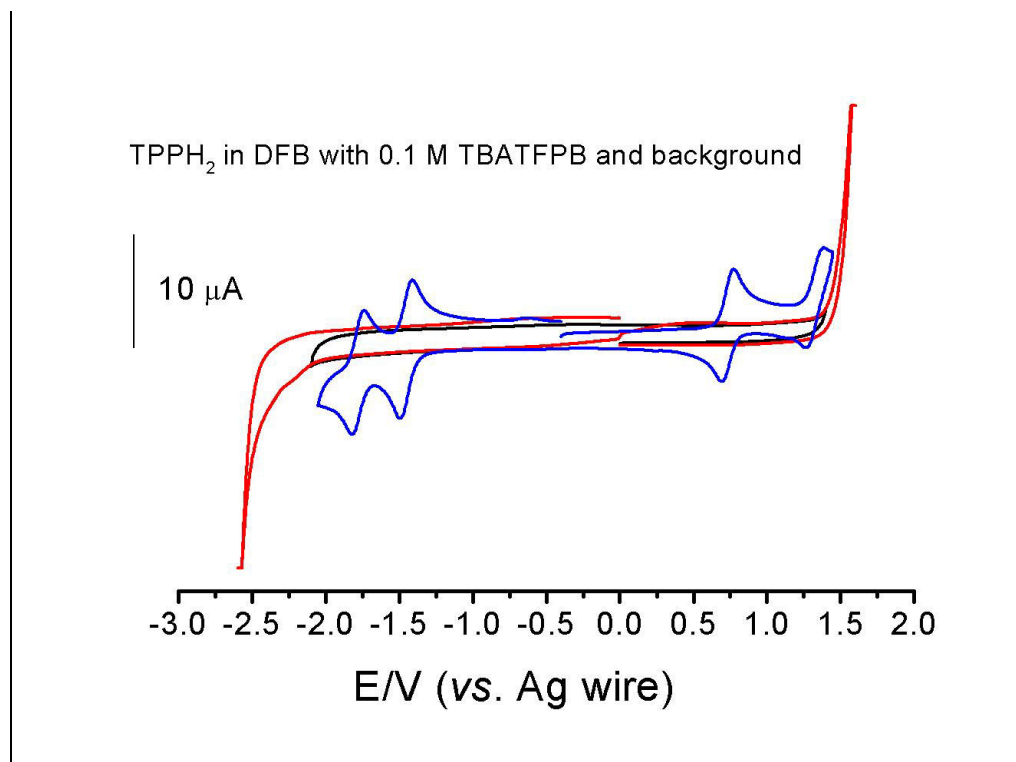

Figure S-1 Cyclic voltammograms of 0.1 M TBATFPB DFB solution (black and red lines) and TPPH<sub>2</sub> in 0.1 M TBATFPB DFB solution (blue line). Scan rate, 100 mV/s.
